# Supplementary material for: Microtopography matters for CH&lt;sub&gt;4&lt;/sub&gt; formation in a peat soil: a combined inhibitor and &lt;sup&gt;13&lt;/sup&gt;C study
Source: Copernicus journal article supplement (doi:10.5194/bg-2016-162), 2016-05-30
Supplement: Supplementary file [file bg-2016-162-AC2-supplement.pdf]

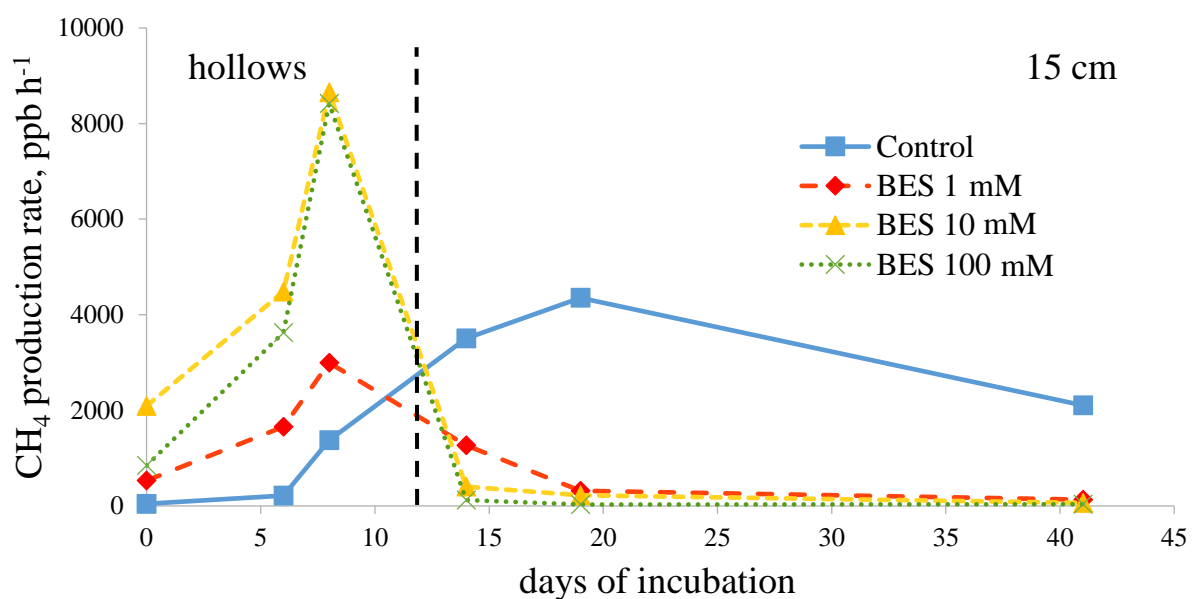

Fig. 1. CH<sub>4</sub> production rates (ppb hour<sup>-1</sup>) at 15 cm depth of the microform type hollows before and after the addition of specific inhibitor BES at increasing concentrations (1, 10, 100 mM). Dashed black line: date of BES addition (day 12). The same BES concentrations were tested for the soil from 100 and 200 cm depths but the CH<sub>4</sub> production was too low to be measured accurately.
